# Supplementary material
Source: PubMed Central journal article supplement (PMC5047069)
Supplement: supp_pp.15.02040_PP2015-02040R2_Supplemental_Tables_S1_S2.pdf [file supp_pp.15.02040_PP2015-02040R2_Supplemental_Tables_S1_S2.pdf]

**Supplemental Table S1.** Comparison of cotyledon vein patterns of wild type and *svr4-2*.

| Genotype      | Total* | Cotyledon vein patterns |            |              |                |               |              |
|---------------|--------|-------------------------|------------|--------------|----------------|---------------|--------------|
|               |        | Zero Areole             | One Areole | Two Areoles  | Three Areoles  | Four Areoles  | Five Areoles |
| WT            | 290    | N.A.                    | N.A.       | 113<br>(39%) | 127<br>(43.8%) | 50<br>(17.2%) | N.A.         |
| <i>svr4-2</i> | 150    | N.A.                    | N.A.       | 72<br>(48%)  | 47<br>(31.3%)  | 31<br>(20.7%) | N.A.         |

\*: Total number of cotyledons examined.

**Supplemental Table S2. Primers used in this study.**

| Primer Name                 | Primer sequence                                                    | Notes                                 |
|-----------------------------|--------------------------------------------------------------------|---------------------------------------|
| <b>F26B6#1F</b>             | 5'-TGC ATT AGG GCT TTG AGA AC-3'                                   | Indel 27/-27                          |
| <b>F26B6#1R</b>             | 5'-TTT CCG ATC CTC TTC AGA AG-3'                                   |                                       |
| <b>F13B15#1F</b>            | 5'-TAA GTG TTG TCT TAG GCC TC-3'                                   | Indel 23/-23                          |
| <b>F13B15#1R</b>            | 5'-GAC TTA CAC GTC TCT CTT TC-3'                                   |                                       |
| <b>F27A10#1F</b>            | 5'-ACC AAT ATG TAT TGG GTC TG-3'                                   | Indel 11/-11                          |
| <b>F27A10#1R</b>            | 5'-AAG TAC AGG TGA ATA ACT GG-3'                                   |                                       |
| <b>F27D4#2F</b>             | 5'-AAG AAG CGT ACA AGG AGA TG-3'                                   | Indel 30/-30                          |
| <b>F27D4#2R</b>             | 5'-GAG TGT CAT AGA ATC GCA AG-3'                                   |                                       |
| <b>F27L4#1F</b>             | 5'-TGA TCT TGA GTA GCC AAG CT-3'                                   | dCAPs w/ <i>HindIII</i>               |
| <b>F27L4#1R</b>             | 5'-TCT TGG TAA TCT TTC GTT TG-3'                                   | cut <i>Ler</i> sequence               |
| <b>T28I24#1F</b>            | 5'-CTT GTG AAG CTG CAG GTC TA-3'                                   | dCAPs w/ <i>XbaI</i> cut              |
| <b>T28I24#1R</b>            | 5'-TCG AGA GTG GAG AAA GTA TG-3'                                   | <i>Col</i> sequence                   |
| <b>24060F</b>               | 5'-CAT GGA TCC TTC TGG ATA AGA GCT TCG<br>TGA TG-3'                | Amplifying <i>SVR9</i>                |
| <b>24060R</b>               | 5'-CAT GGA TCC TTG GCT CTC TTG AGA CAT<br>GGT AG-3'                | cDNA                                  |
| <b>24060F1</b>              | 5'- CAT TGA CGT TTA GCT TCC AA-3'                                  |                                       |
| <b>24060R1</b>              | 5'-CTG CAT CAG GCG ATA GTA TA-3'                                   |                                       |
| <b>24060F2</b>              | 5'-CGT AGA GCA ATT GGT AGT AG-3'                                   |                                       |
| <b>24060R2</b>              | 5'-TAG CTC TTG CTA AGC TCC TC-3'                                   | Genotyping                            |
| <b>24060F3</b>              | 5'-GAT ACG AAC AGC AAA AGA GG-3'                                   | <i>svr9-1</i> and                     |
| <b>24060R3</b>              | 5'-CTA GTT TCT GTC ATG GAA GC-3'                                   | <i>svr9-2</i>                         |
| <b>24060F4</b>              | 5'-TAT ACT ATC GCC TGA TGC AG-3'                                   |                                       |
| <b>24060R4</b>              | 5'-CCT CTT TTG CTG TTC GTA TC-3'                                   |                                       |
| <b>24060PF-XbaI2</b>        | 5'-CAT TCT AGA AAT CAG CAC AGG GGT AGG<br>ACC AG-3'                | Amplifying the<br>promoter region     |
| <b>24060PR-BamHI2</b>       | 5'-CAT GGA TCC GGC GCT TCT TCT TCA CTC<br>AGA GG -3'               | of <i>SVR9</i> cDNA                   |
| <b>At2g24060GFPR</b>        | 5'-CAT GGG ATC CAC CAC CAC CAC CAG<br>AAT CGA TCT GTA GAG GCT C-3' | Generating<br><i>P35S:SVR9-GFP</i>    |
| <b>cTPF</b>                 | 5'-CAT TCT AGA TTC TGG ATA AGA GCT TCG<br>TGA TG-3'                | Amplifying the<br>cTP region of       |
| <b>cTPR</b>                 | 5'-CAT GGA TCC TCG ATA ACC TCC ACC ACC<br>ACC GC-3'                | <i>SVR9</i>                           |
| <b>GFP-F</b>                | 5'-CAT GGA TCC ATG GTG AGC AAG GGC GAG<br>GAG-3'                   | Amplifying eGFP<br>coding             |
| <b>GFP-R</b>                | 5'-CAT CTC GAG TTA CTT GTA CAG CTC GTC<br>CAT-3'                   | sequences                             |
| <b><i>E. coli</i> IF3-F</b> | 5'-CAT GGA TCC ATG AAA GGC GGA AAA CGA<br>GTT CA-3'                | Amplifying <i>E. coli</i> infC coding |

---

|                             |                                                              |                                                     |
|-----------------------------|--------------------------------------------------------------|-----------------------------------------------------|
| <b><i>E. coli</i> IF3-R</b> | 5'-CAT CTC GAG TTA CTG TTT CTT CTT AGG<br>AGC GA -3'         | sequences                                           |
| <b>30690F</b>               | 5'-CAT GGA TCC CAT TCT AAT TGG TGG AGA<br>GAC AG-3'          | Amplifying                                          |
| <b>30690R</b>               | 5'-CAT GGA TCC TTT ACA TCA GAC AAT TCC<br>GCA TC-3'          | <i>SVR9L1</i> cDNA                                  |
| <b>30690F1</b>              | 5'-TGG TCT TCG ACT CTG TGT AC-3'                             | Genotyping                                          |
| <b>30690R1</b>              | 5'-CAC CGT CTT GCA AGA ACT TC-3'                             | <i>svr9l1-1</i>                                     |
| <b>At4g30690GFPR</b>        | 5'-CATGCCATGGAACCACCACCACCACCAC<br>CTATATCTTGTGTTGCAGTTAT-3' | Generating<br><i>P35S:SVR9L1-GFP</i>                |
| <b>CUC2F</b>                | 5'-CAT CTC GAG ATG GAC ATT CCG TAT TAC<br>CAC-3'             | Amplifying <i>CUC2</i>                              |
| <b>CUC2R</b>                | 5'-CAT CTC GAG TCA GTA GTT CCA AAT ACA<br>GTC-3'             | cDNA                                                |
| <b>CUC2F1Z</b>              | 5'-GAC AGA GAG ATC TTT AGT TC-3'                             | Semi-quantitati                                     |
| <b>CUC2R1Z</b>              | 5'- AGA CGG CTG AAT GAG TTA AC-3'                            | ve RT-PCR<br>analysis of <i>CUC2</i><br>transcripts |
| <b>CUC2F(s)</b>             | 5'-GAG TAA TTG GGT TAT GCA TG-3'                             | Genotyping                                          |
| <b>CUC2R1</b>               | 5'-TGC GTA GGA GCA ACT GCT G-3'                              | <i>cuc2-101</i> and                                 |
| <b>CUC2DF</b>               | 5'-TCT CCT GGA TCC GAC CAC TA -3'                            | <i>cuc2-1D</i>                                      |

---
